# Supplementary material
Source: publisher figshare collection journal article supplement (https://acs.figshare.com/ndownloader/files/5753061)
Supplement: Supplementary file 1 [file 5753061]

# J | A | C | S

JOURNAL OF THE AMERICAN CHEMICAL SOCIETY

J. Am. Chem. Soc., 1997, 119(5), 1043-1051, DOI:[10.1021/ja963465r](https://doi.org/10.1021/ja963465r)

## Terms & Conditions

Electronic Supporting Information files are available without a subscription to ACS Web Editions. The American Chemical Society holds a copyright ownership interest in any copyrightable Supporting Information. Files available from the ACS website may be downloaded for personal use only. Users are not otherwise permitted to reproduce, republish, redistribute, or sell any Supporting Information from the ACS website, either in whole or in part, in either machine-readable form or any other form without permission from the American Chemical Society. For permission to reproduce, republish and redistribute this material, requesters must process their own requests via the RightsLink permission system. Information about how to use the RightsLink permission system can be found at <http://pubs.acs.org/page/copyright/permissions.html>

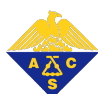

ACS Publications

MOST TRUSTED. MOST CITED. MOST READ.

Copyright © 1997 American Chemical Society

JAA43465  
Juan Madoz, Boris A. Kuznetsov, Francisco J. Medrano, José L. García and Victor M. Fernández.

"Functionalization of Gold Surfaces for Specific and Reversible Attachment of a Fused  $\beta$ -Galactosidase and Choline-Receptor Protein"

## SUPPORTING INFORMATION

**Table S1.** Atomic composition of monolayers as determined by XPS.

| Monolayer structure               |    | Atoms |     |      |     |
|-----------------------------------|----|-------|-----|------|-----|
|                                   |    | S     | C   | N    | O   |
| TBA                               | a) | 1     | 4   | 0    | 2   |
|                                   | b) | 0.48  | 4   | 0    | 1.1 |
| TBA + TCh (1:1)                   | a) | 1     | 4.5 | 5    | 1   |
|                                   | b) | 0.42  | 4.5 | 4.9  | 1   |
| TBA-[DADOO-EA]-<br>-Epi-CA (1:8)  | a) | 1     | 6.3 | 1.1  | 2   |
|                                   | b) | 0.62  | 6.3 | 1.1  | 2.1 |
| TBA-[DADOO-EA]-<br>-Epi-TCh (1:8) | a) | 1     | 6.6 | 1.1  | 2   |
|                                   | b) | 0.73  | 6.6 | 0.52 | 2.5 |

<sup>a</sup> Expected number of atoms per atom of sulfur in the monolayer. <sup>b</sup> Number of atoms detected in the monolayer normalized to the expected number of carbon atoms.

### SUPPORTING INFORMATION

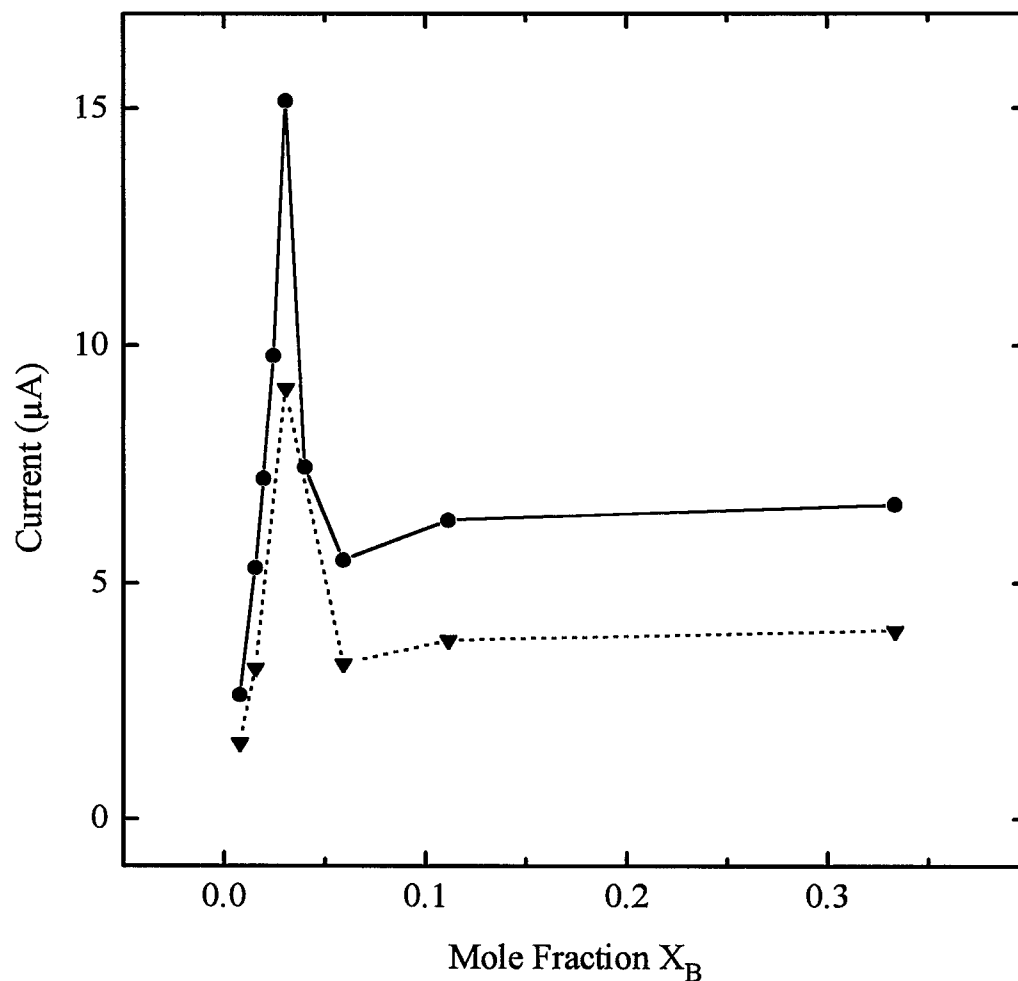

**Figure S1.** Anodic peak currents measured after 12 min. incubation in 1 mM PAPG solution of choline modified electrodes immersed in solutions of C-LYTA- $\beta$ -Galactosidase chimera and washed with 50 mM phosphate buffer, pH 7.3m 1 M KCl as function of the mole fraction of DADOO in setp 2 of the monolayer synthesis (Fig. 2). Note that  $X_B$  does not necessarily represent the mole fraction of choline in the monolayer. TBA electrode (dashed line); TOA electrode (solid line). Other experimental conditions as in Fig. 8.

Juan Madoz, Boris A. Kuznetsov, Francisco J. Medrano, José L. García and Víctor M. Fernández.

"Functionalization of Gold Surfaces for Specific and Reversible Attachment of a Fused  $\beta$ -Galactosidase and Choline-Receptor Protein"

### SUPPORTING INFORMATION

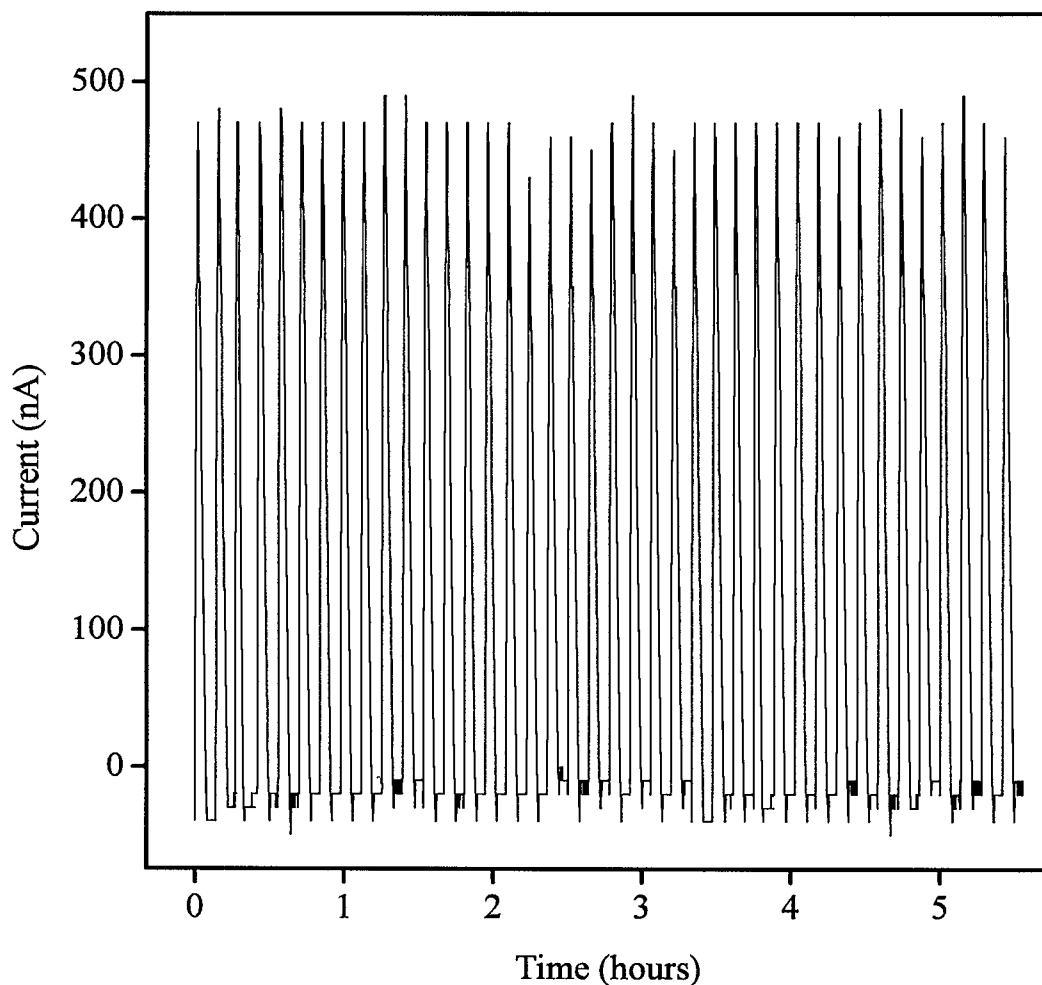

**Figure S2.** FIA recording of repetitive determinations of 4 mM PAPG in 50 mM phosphate buffer, pH 7.3, 0.1 M KCl using a gold disc electrode ( $0.07 \text{ cm}^2$ ) modified with choline-monolayer and C-LYTA- $\beta$ -GAL. Flow injection conditions: flow rate,  $4 \text{ ml min}^{-1}$ ; injection volume, 0.05 ml. The applied potential was 0.25 V vs Ag/AgCl, 3 M NaCl.
